# Supplementary material for: Obesity as a Risk Factor for Complications and Mortality in Individuals with SARS-CoV-2: A Systematic Review
Source: MDPI journal article supplement (doi:10.3390/nu16040543), 2024-02-16
Supplement: s1 [file s1]

Supplementary Table S1. Methodological quality assessment \*.

| Criteria                        | 1 | 2 | 3 | 4   | 5 | 6 | 7 | 8   | 9 | 10 | 11 | 12  | 13 | 14 | 15 | 16  | 17 | Total |
|---------------------------------|---|---|---|-----|---|---|---|-----|---|----|----|-----|----|----|----|-----|----|-------|
| AlBahrani et al. [36]           | 0 | 1 | 0 | N/D | 1 | 1 | 0 | N/D | 1 | 1  | 1  | N/D | 0  | 1  | 1  | N/D | 0  | 7     |
| Torrego-Ellacuría et al. [37]   | 1 | 1 | 0 | N/D | 1 | 0 | 0 | N/D | 1 | 1  | 0  | N/D | 0  | 1  | 1  | N/D | 0  | 7     |
| Tong [38]                       | 1 | 1 | 0 | N/D | 1 | 0 | 1 | N/D | 0 | 1  | 0  | N/D | 0  | 1  | 1  | N/D | 0  | 7     |
| Tonietto et al. [50]            | 1 | 1 | 1 | N/D | 1 | 0 | 1 | N/D | 1 | 1  | 0  | N/D | 0  | 1  | 1  | N/D | 0  | 9     |
| Yamamoto et al. [39]            | 1 | 1 | 0 | N/D | 1 | 0 | 1 | N/D | 1 | 1  | 0  | N/D | 0  | 1  | 1  | N/D | 0  | 8     |
| Zahid et al. [27]               | 1 | 1 | 1 | N/D | 1 | 1 | 1 | N/D | 1 | 1  | 0  | N/D | 0  | 1  | 1  | N/D | 0  | 10    |
| Caccialanza et al. [40]         | 0 | 1 | 1 | N/D | 1 | 1 | 0 | N/D | 1 | 1  | 0  | N/D | 0  | 1  | 1  | N/D | 0  | 8     |
| Palaiodimos et al. [51]         | 1 | 1 | 1 | N/D | 1 | 1 | 1 | N/D | 0 | 1  | 0  | N/D | 0  | 1  | 1  | N/D | 0  | 9     |
| Salvy et al. [28]               | 1 | 1 | 1 | N/D | 1 | 1 | 1 | N/D | 1 | 1  | 0  | N/D | 0  | 1  | 1  | N/D | 0  | 10    |
| Stevanovic et al. [29]          | 1 | 1 | 1 | N/D | 1 | 1 | 1 | N/D | 1 | 1  | 0  | N/D | 0  | 1  | 1  | N/D | 0  | 10    |
| Agca et al. [30]                | 1 | 1 | 1 | N/D | 1 | 1 | 1 | N/D | 1 | 1  | 0  | N/D | 0  | 1  | 1  | N/D | 0  | 10    |
| Al-Salameh et al. [52]          | 1 | 1 | 1 | N/D | 1 | 1 | 0 | N/D | 1 | 1  | 0  | N/D | 0  | 1  | 1  | N/D | 0  | 9     |
| Azarkar et al. [41]             | 0 | 1 | 1 | N/D | 1 | 1 | 0 | N/D | 1 | 1  | 0  | N/D | 0  | 1  | 1  | N/D | 0  | 8     |
| Cai et al. [53]                 | 1 | 1 | 0 | N/D | 1 | 1 | 1 | N/D | 1 | 1  | 0  | N/D | 0  | 1  | 1  | N/D | 0  | 9     |
| Gao et al. [35]                 | 0 | 0 | 0 | N/D | 0 | 1 | 1 | N/D | 1 | 1  | 0  | N/D | 0  | 1  | 1  | N/D | 0  | 6     |
| Gil et al. [31]                 | 1 | 1 | 1 | N/D | 1 | 1 | 1 | N/D | 1 | 1  | 1  | N/D | 0  | 1  | 1  | N/D | 0  | 11    |
| Jayanama et al. [54]            | 1 | 1 | 0 | N/D | 1 | 1 | 1 | N/D | 1 | 1  | 0  | N/D | 0  | 1  | 1  | N/D | 0  | 9     |
| Kang et al.[42]                 | 1 | 1 | 0 | N/D | 0 | 1 | 1 | N/D | 1 | 1  | 0  | N/D | 0  | 1  | 1  | N/D | 0  | 8     |
| Le Guen et al. [55]             | 1 | 1 | 0 | N/D | 1 | 1 | 1 | N/D | 1 | 1  | 0  | N/D | 0  | 1  | 1  | N/D | 0  | 9     |
| Lucar et al. [56]               | 1 | 1 | 0 | N/D | 1 | 1 | 1 | N/D | 1 | 1  | 0  | N/D | 0  | 1  | 1  | N/D | 0  | 9     |
| Martínez Urbistondo et al. [43] | 1 | 1 | 0 | N/D | 0 | 1 | 1 | N/D | 1 | 1  | 0  | N/D | 0  | 1  | 1  | N/D | 0  | 8     |
| Martinuzzi et al. [44]          | 1 | 0 | 1 | N/D | 0 | 1 | 1 | N/D | 1 | 1  | 0  | N/D | 0  | 1  | 1  | N/D | 0  | 8     |
| McNeill et al. [45]             | 1 | 1 | 1 | N/D | 0 | 0 | 1 | N/D | 1 | 1  | 0  | N/D | 0  | 1  | 1  | N/D | 0  | 8     |
| Naaraayan et al. [32]           | 1 | 1 | 1 | N/D | 1 | 1 | 1 | N/D | 1 | 1  | 0  | N/D | 0  | 1  | 1  | N/D | 0  | 10    |
| Ninomiya et al. [57]            | 1 | 1 | 1 | N/D | 0 | 1 | 1 | N/D | 1 | 1  | 0  | N/D | 0  | 1  | 1  | N/D | 0  | 9     |
| Okauchi et al. [58]             | 0 | 1 | 1 | N/D | 1 | 1 | 1 | N/D | 1 | 1  | 0  | N/D | 0  | 1  | 1  | N/D | 0  | 9     |
| Pérez-Cruz et al. [46]          | 1 | 1 | 0 | N/D | 1 | 1 | 0 | N/D | 1 | 1  | 0  | N/D | 0  | 1  | 1  | N/D | 0  | 8     |
| Ye et al. [59]                  | 0 | 1 | 1 | N/D | 1 | 1 | 1 | N/D | 1 | 1  | 0  | N/D | 0  | 1  | 1  | N/D | 0  | 9     |
| Zeng et al. [33]                | 1 | 1 | 1 | N/D | 1 | 1 | 1 | N/D | 1 | 1  | 0  | N/D | 0  | 1  | 1  | N/D | 0  | 10    |
| Al-Sabah et al. [47]            | 0 | 1 | 0 | N/D | 1 | 1 | 1 | N/D | 1 | 1  | 0  | N/D | 0  | 1  | 1  | N/D | 0  | 8     |
| Anderson et al. [48]            | 1 | 1 | 0 | N/D | 1 | 1 | 0 | N/D | 1 | 1  | 0  | N/D | 0  | 1  | 1  | N/D | 0  | 8     |
| Kaeuffer et al. [60]            | 1 | 1 | 0 | N/D | 1 | 1 | 1 | N/D | 1 | 1  | 0  | N/D | 0  | 1  | 1  | N/D | 0  | 9     |
| Mostaghim et al. [61]           | 1 | 1 | 0 | N/D | 1 | 1 | 1 | N/D | 1 | 1  | 0  | N/D | 0  | 1  | 1  | N/D | 0  | 9     |
| Nakeshbandi et al. [34]         | 1 | 1 | 1 | N/D | 1 | 1 | 1 | N/D | 1 | 1  | 0  | N/D | 0  | 1  | 1  | N/D | 0  | 10    |
| Rao et al. [49]                 | 1 | 0 | 1 | N/D | 0 | 1 | 1 | N/D | 1 | 1  | 0  | N/D | 0  | 1  | 1  | N/D | 0  | 8     |

Note: \* According to the Downs & Black checklist. N/D: not determined; 1: complies; 0: does not comply. Criteria: 1: Is the hypothesis/objective of the study clearly described? 2: Are the main outcomes to be measured clearly described in the introduction or methods section? 3: Are the patients' characteristics in the study clearly described? 4: Are the interventions of interest clearly described? 5: Are the distributions of the main confounding factors in each group of subjects to be compared clearly described? 6: Are the main findings of the study clearly described? 7: Does the study provide estimates of random variability in the data for the main outcomes? 8: Have all important adverse events that may result from the intervention been reported? 9: Have actual probability values (e.g., 0.035 instead of <0.05) been reported for the main outcomes, except when the probability value is less than 0.001? 10: Are the sample selection procedures clearly described? 11: Were the study participants representative of the population from which they were recruited? 12: Was there an attempt to blind those who measured the results of the intervention? 13: Was it clear whether any of the study results were based on data mining (i.e., misuse of data analysis to present them as statistically significant)? 14: Were appropriate statistical tests used to assess the main outcomes? 15: Were accurate (valid and reliable) main outcome measures used? 16: Were patients recruited from the same population in different intervention groups (trials and cohort studies) or cases and controls (case-control studies)? 17: Was there an adequate adjustment for confounding in the analyses from which the main findings were drawn?
